# Supplementary material for: Design of bio-molecular interfaces using liquid crystals demonstrating endotoxin interactions with bacterial cell wall components
Source: Royal Society of Chemistry journal article supplement (doi:10.1039/c5ra09640e), 2015-01-01
Supplement: c5ra09640e1.pdf [file c5ra09640e1.pdf]

## Supporting Information

# Design of bio-molecular interfaces using liquid crystals demonstrating Endotoxin interactions with bacterial cell wall components

*Dibyendu Das<sup>†</sup> Sumyra Sidiq<sup>†</sup> and Santanu Kumar Pal<sup>\*†</sup>*

<sup>†</sup> *Department of Chemical Sciences, Indian Institute of Science Education and Research (IISER) Mohali, Sector-81, Knowledge City, Manauli-140306, India.*

*E-mail: skpal@iisermohali.ac.in*

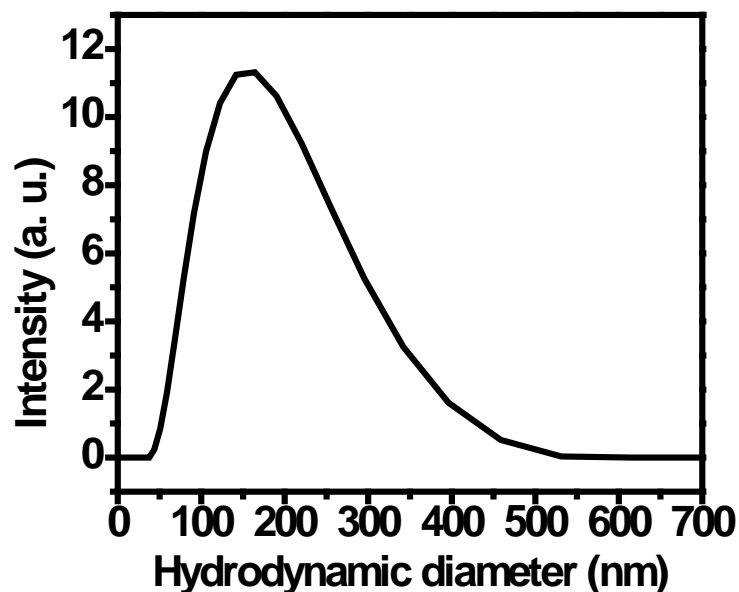

**Figure S1.** Graphical representation describing the LPS vesicle size distribution using dynamic light scattering.

| Biomolecule | Zeta potential (mV) |
|-------------|---------------------|
| LPS         | -5.2 ± 1.4          |
| PG          | -4.7 ± 0.2          |
| LTA         | -11.7 ± 0.9         |
| LPS+LTA     | -9.8 ± 2.2          |
| PG+ LPS     | -4.4 ± 0.1          |

**Table S1.** Zeta potential measurements of different biomolecules used in the study.

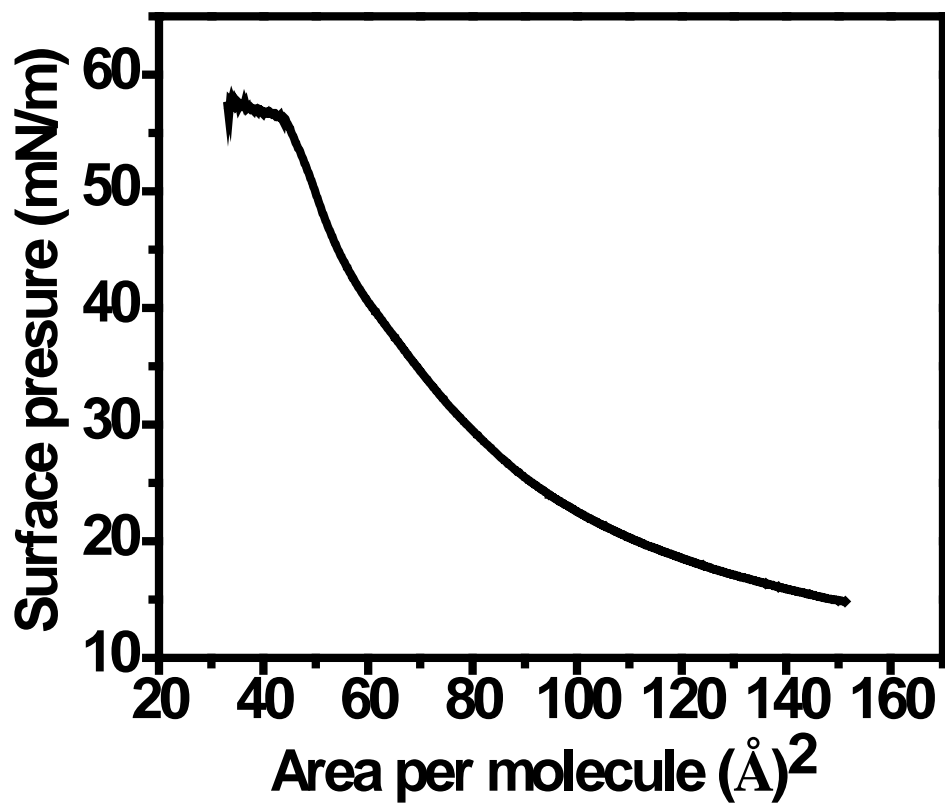

**Figure S2.** Surface pressure ( $\pi$ )-area per molecule ( $A_m$ ) isotherm for LPS on NaCl based sub phase at 25 °C.

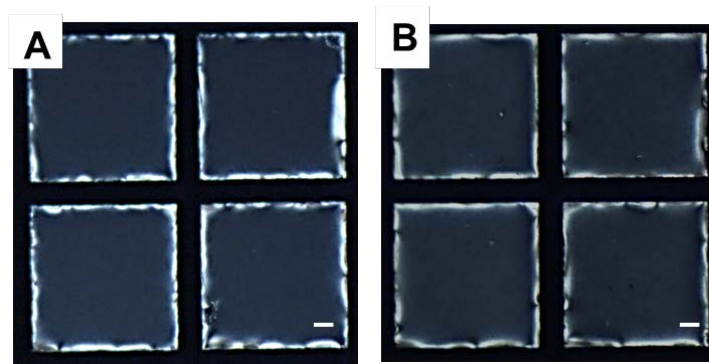

**Figure S3.** Represents polarized optical microscopic images of 5CB decorated with LPS at aqueous/LC interface, (A) before and (B) after addition of 500 µg/mL aqueous solution of starch respectively. Scale bar = 40µm.

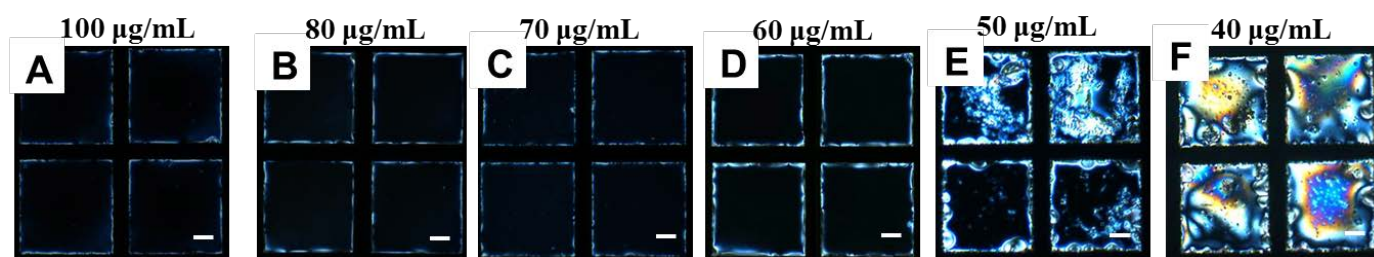

**Figure S4.** Represents polarized optical images of 5CB contained in gold grids supported on DMOAP-treated glass slides and placed in contact with A) 100 µg/mL, B) 80 µg/mL, C) 70 µg/mL, D) 60 µg/mL, E) 50 µg/mL, and F) 40 µg/mL concentrations of LPS at 5CB/aqueous interface after washing with Tris buffer followed by 24 h of incubation. The Figure is reproduced from the Supporting Information of our previous work (D. Das, S. Sidiq and S. K. Pal, *ChemPhysChem*, 2015, **16**, 753–760) for convenience to the readers. Scale bar = 40µm.

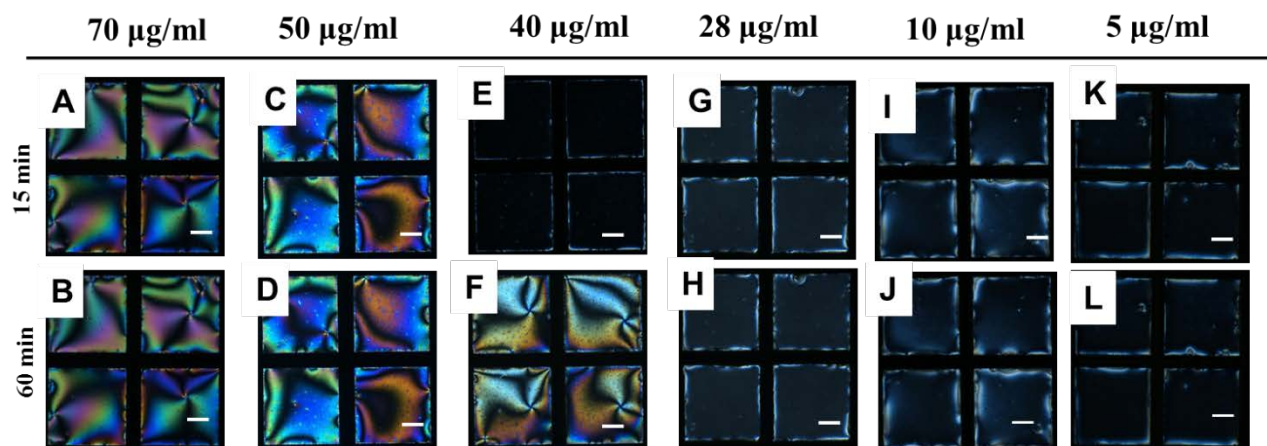

**Figure S5.** Represents polarized optical micrographs of 5CB decorated with LPS at aqueous/LC interface, after exposing aqueous PG solution with varying concentrations. (A, B) 70  $\mu\text{g/ml}$ , (C, D) 50  $\mu\text{g/ml}$ , (E, F) 40  $\mu\text{g/ml}$ , (G, H) 28  $\mu\text{g/ml}$ , (I, J) 10  $\mu\text{g/ml}$ , (K, L) 5  $\mu\text{g/ml}$ . Top and bottom row represents incubation of PG solution on LPS decorated aqueous/5CB interface over period of 15 min and 60 min respectively. Scale bar = 40  $\mu\text{m}$ .

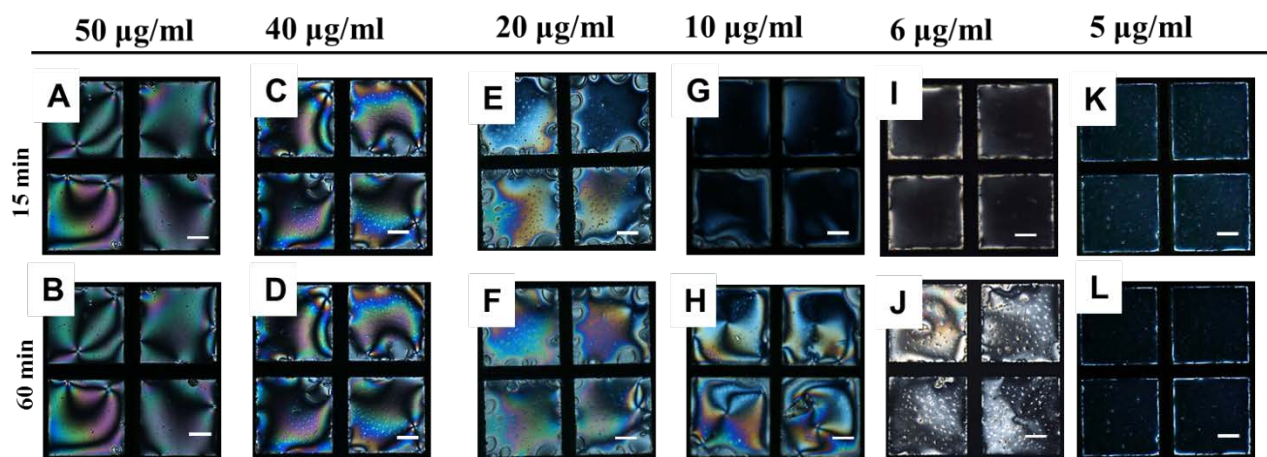

**Figure S6.** Represents polarized optical images of 5CB laden with LPS at aqueous/LC interface, after exposing aqueous LTA solution with varying concentrations. (A, B) 50  $\mu\text{g/ml}$ , (C, D) 40  $\mu\text{g/ml}$ , (E, F) 20  $\mu\text{g/ml}$ , (G, H) 10  $\mu\text{g/ml}$ , (I, J) 6  $\mu\text{g/ml}$ , (K, L) 5  $\mu\text{g/ml}$ . Top and bottom row represents incubation of LTA solution on LPS laden aqueous/5CB interface over period of 15 min and 60 min respectively. Scale bar = 40  $\mu\text{m}$ .
